# Supplementary material for: Sugarcane juice derived carbon dot–graphitic carbon nitride composites for bisphenol A degradation under sunlight irradiation
Source: publisher site journal article supplement (doi:10.3762/bjnano.9.35), 2018-01-30
Supplement: Additional file 1 [file 2190-4286-9-35-S1.pdf]

# **Sugarcane juice derived carbon dot–graphitic carbon nitride composites for bisphenol A degradation under sunlight irradiation**

Lan Ching Sim\*<sup>1</sup>, Jing Lin Wong<sup>1</sup>, Chen Hong Hak<sup>1</sup>, Jun Yan Tai<sup>1</sup>, Kah Hon Leong<sup>1</sup>, and Pichiah Saravanan<sup>2</sup>

Address: <sup>1</sup>Department of Environmental Engineering, Faculty of Engineering and Green Technology, Universiti Tunku Abdul Rahman, Jalan Universiti, Bandar Barat, 31900, Kampar, Perak, Malaysia and <sup>2</sup>Environmental Nanotechnology Laboratory, Department of Environmental Science and Engineering, Indian Institute of Technology (ISM), Dhanbad 826004, Jharkhand, India

Email: Lan Ching Sim - simcl@utar.edu.my

\* Corresponding author

**Additional experimental data**

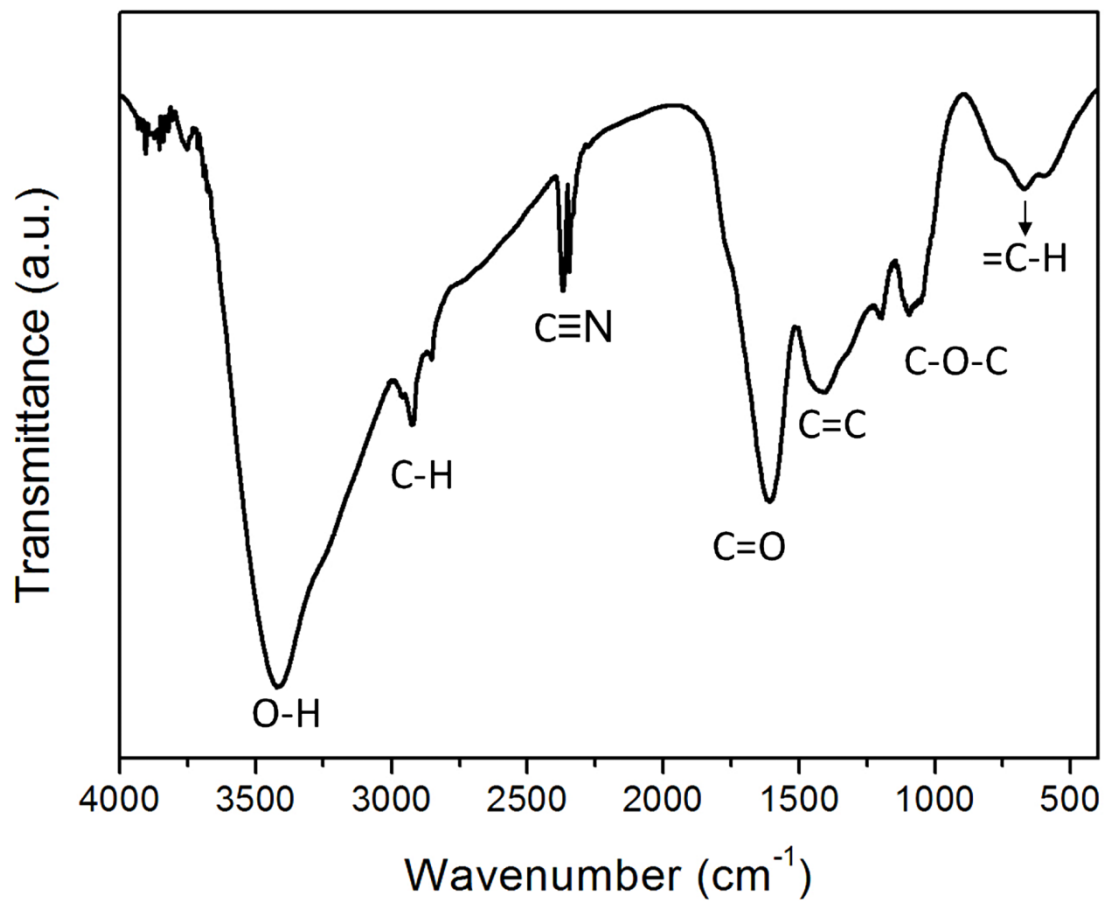

**Figure S1:** FTIR spectrum of CDs.

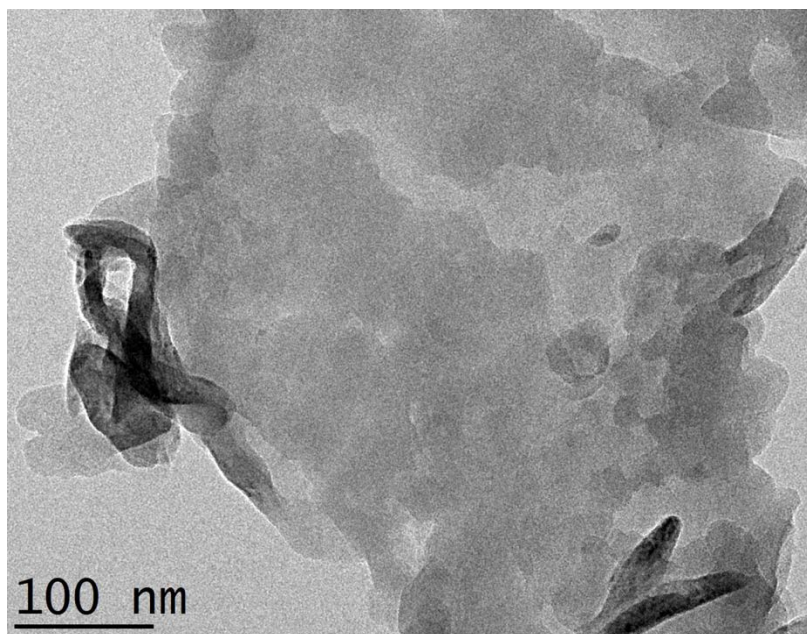

**Figure S2:** TEM image of g-C<sub>3</sub>N<sub>4</sub>.

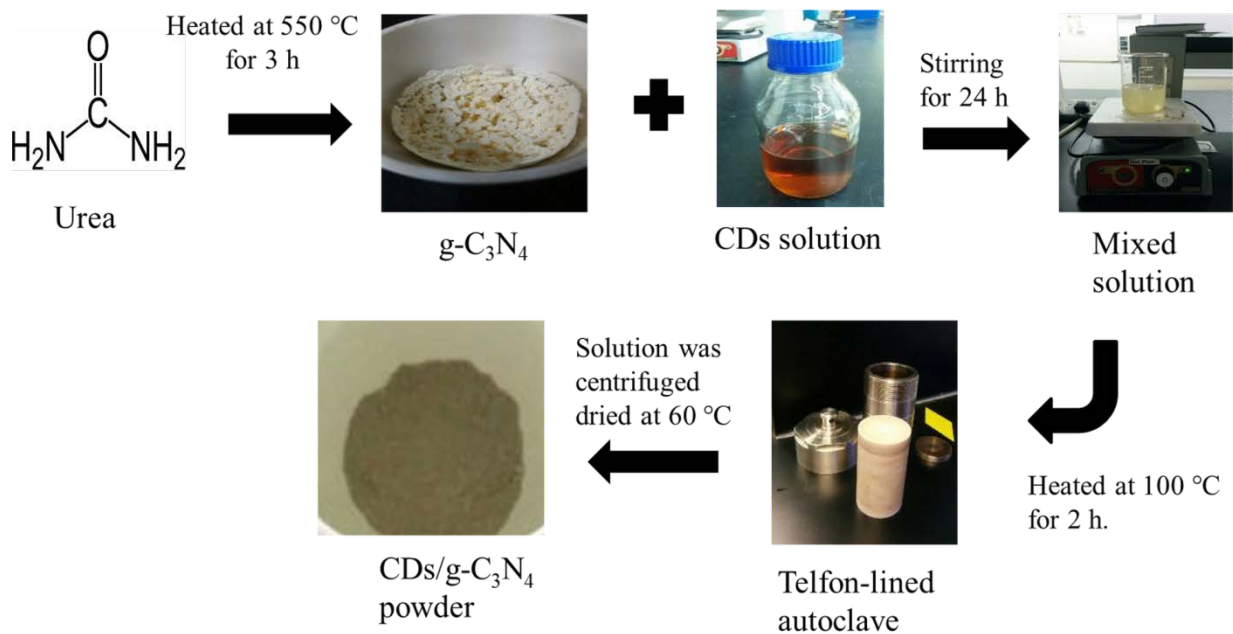

**Figure S3:** Synthesis route of CDs/g-C<sub>3</sub>N<sub>4</sub> composites.

**Table S1:** The photodegradation rate of BPA by synthesized photocatalysts.

| Sample                                    | Photodegradation rate (%) | K (min <sup>-1</sup> ) |
|-------------------------------------------|---------------------------|------------------------|
| g-C <sub>3</sub> N <sub>4</sub>           | 68.20                     | 0.01118                |
| CDs/g-C <sub>3</sub> N <sub>4</sub> (0.1) | 76.66                     | 0.01521                |
| CDs/g-C <sub>3</sub> N <sub>4</sub> (0.2) | 95.51                     | 0.02501                |
| CDs/g-C <sub>3</sub> N <sub>4</sub> (0.5) | 100                       | 0.04329                |

**Table S2:** Comparison of the catalytic efficiency between the nanocomposites synthesized in this work and previous works see [15,16] in main text.

| Sample                                               | BPA Degradation Rate (%) | Reaction Time (min) | Ref. (see main text) |
|------------------------------------------------------|--------------------------|---------------------|----------------------|
| CDs/g-C <sub>3</sub> N <sub>4</sub> (0.1)            | 76.7                     | 90                  | *                    |
| CDs/g-C <sub>3</sub> N <sub>4</sub> (0.2)            | 95.5                     | 90                  | *                    |
| CDs/g-C <sub>3</sub> N <sub>4</sub> (0.5)            | 100                      | 90                  | *                    |
| HT-g-C <sub>3</sub> N <sub>4</sub> /TiO <sub>2</sub> | 46.9                     | 360                 | [15]                 |
| g-C <sub>3</sub> N <sub>4</sub> /TiO <sub>2</sub>    | 45.8                     | 360                 | [15]                 |
| g-C <sub>3</sub> N <sub>4</sub>                      | 55                       | 210                 | [16]                 |
| acid treated g-C <sub>3</sub> N <sub>4</sub>         | 100                      | 210                 | [16]                 |

\* current work

**Table S3:** The sunlight intensity for photodegradation experiments.

| Time Interval (min)       | 0   | 15  | 30  | 45  | 60  | 75  | 90  | 105 | 120 |
|---------------------------|-----|-----|-----|-----|-----|-----|-----|-----|-----|
| Light intensity (100 lux) | 823 | 867 | 904 | 920 | 870 | 862 | 934 | 950 | 900 |
